# Supplementary material
Source: publisher figshare collection journal article supplement (https://springernature.figshare.com/ndownloader/files/7434271)
Supplement: Supplementary file [file 7434271]

additional file 4 (top)

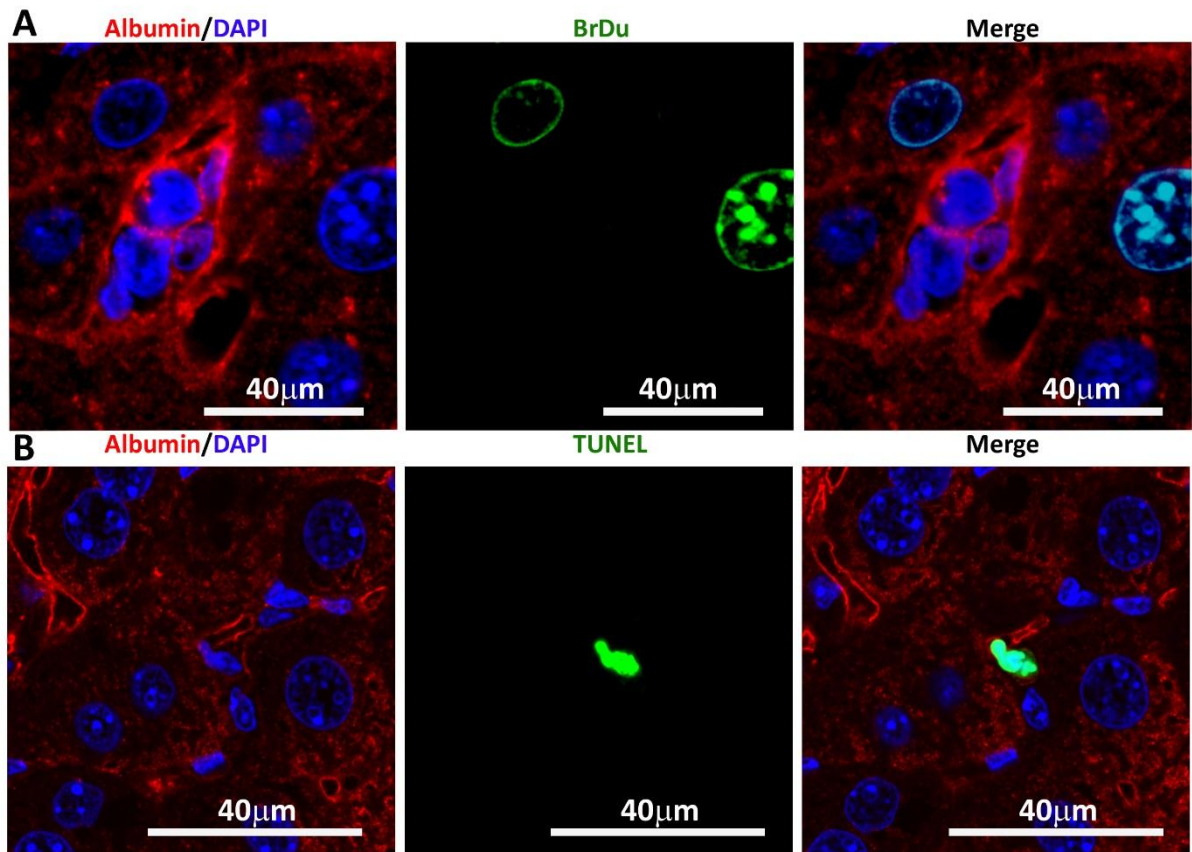

**Additional file 4:** *Co-localization of hepatocyte and proliferation or apoptotic markers in vivo.*

Hepatocyte proliferation after Hpx was identified by colocalization of BrDu incorporation (Fitc –green-) and albumin (Alexa Fluor 555 –red-). Hepatocyte apoptosis after Hpx was evaluated by colocalization of TUNEL (Fitc –green) and albumin. Nuclei were counterstained with DAPI (blue). Representative micrograph of **(A)** proliferation and **(B)** apoptosis confocal microscopy two days after Hpx.
